# Supplementary material
Source: PubMed Central journal article supplement (PMC2453710)
Supplement: 0803801105_0803801105SI.pdf [file 0803801105_0803801105SI.pdf]

# Supporting Information

Kong *et al.* 10.1073/pnas.0803801105

## SI Materials and Methods

**General DNA Procedures.** DNA manipulations were carried out as described by Sambrook *et al.* (1). Oligonucleotide synthesis was done commercially. *Escherichia coli* and *Salmonella* were transformed by electroporation. We used suicide vector technology (2, 3) and P22-mediated transduction to generate precise deletion/deletion-insertion mutations (4). Conjugational transfer of suicide vectors was performed by using the suicide vector donor strain MGN617 (5). PCR amplification was used to obtain DNA fragments for cloning and for verification of chromosomal deletion mutations. Nucleotide sequencing reactions were performed by using ABI Prism fluorescent Big Dye terminators according to the instructions of the manufacturer (PE Biosystems).

**Construction of Regulated Programmed Lysis *S. Typhimurium* Vaccine Host-Vector System.** The  $\Delta P_{murA7}::araC P_{BAD} murA$  deletion-insertion mutation was constructed by standard methods and introduced into wild-type strain  $\chi 3761$  to yield  $\chi 8645$ . The  $\Delta asdA19::araC P_{BAD} c2$  deletion-insertion mutation was introduced into  $\chi 8645$  by P22HT *int* transduction from  $\chi 8290$

( $\Delta asdA19::TT araC P_{BAD} c2$ ). The  $\Delta endA2311$ ,  $\Delta (gmd-fcl)-26$  and  $\Delta relA1123$  mutations were added sequentially, using suicide vectors (Table S1) resulting in vaccine strain  $\chi 8937$ . The presence of mutations and absence of suicide vector sequences were confirmed by PCR, using suitable primer sets (Table S2). The primers and steps used to construct plasmids are described as follows. The *E. coli* B/r *araC P<sub>BAD</sub>* activator-promoter was derived from pBAD18 (6). The *E. coli* K-12 *araC P<sub>BAD</sub>* activator-promoter was PCR amplified by using primers *araC-NsiI* and *EaraBAD-EcoRI* from strain  $\chi 289$ . The SD-GTG mutation in pYA3530 was introduced into the *asdA* gene by PCR. The ATG-*murA* gene was amplified by PCR from *E. coli* K-12 strain  $\chi 289$  (*ghnV42*  $\lambda$ -T3<sup>r</sup>), using primers *EmurA-EcoRI* 5' and *EmurA-EcoRI* 3', then the ATG start codon of the *murA* gene was changed to GTG by PCR. The P22 P<sub>R</sub> promoter was derived from plasmid pMEG104. The P<sub>trc</sub>-5ST1T2-P<sub>BR</sub> *ori* fragment came from plasmid pYA3342. The fragment including in-frame fusion of the rPspA Rx1 ( $\alpha$ -helical region of PspA from amino acid residue 3 to 257 of mature PspA<sub>Rx1</sub>) to the  $\beta$ -lactamase signal sequence was derived from pYA3634 (7). Expression of the rPspA Rx1 antigen was verified by SDS/PAGE and Western blot analysis with the anti-PspA monoclonal antibody Xi126 (8).

1. Sambrook J, Fritsch EF, Maniatis T (1989) in *Molecular Cloning: A Laboratory Manual* (Cold Spring Harbor Laboratory, Plainview, NY).
2. Miller VL, Mekalanos JJ (1988) A novel suicide vector and its use in construction of insertion mutations: Osmoregulation of outer membrane proteins and virulence determinants in *Vibrio cholerae* requires *toxR*. *J Bacteriol* 170:2575–2583.
3. Edwards RA, Keller LH, Schifferli DM (1998) Improved allelic exchange vectors and their use to analyze 987P fimbria gene expression. *Gene* 207:149–157.
4. Kang HY, Dozois CM, Tinge SA, Lee TH, Curtiss R, III (2002) Transduction-mediated transfer of unmarked deletion and point mutations through use of counterselectable suicide vectors. *J Bacteriol* 184:307–312.
5. Roland K, Curtiss R, III, Sizemore D (1999) Construction and evaluation of a *cya* *crp* *Salmonella typhimurium* strain expressing avian pathogenic *Escherichia coli* O78 LPS as a vaccine to prevent airsacculitis in chickens. *Avian Dis* 43:429–441.
6. Guzman LM, Belin D, Carson MJ, Beckwith J (1995) Tight regulation, modulation, and high-level expression by vectors containing the arabinose P<sub>BAD</sub> promoter. *J Bacteriol* 177:4121–4130.
7. Curtiss R, III *et al.* (2007) in *Virulence Mechanisms of Bacterial Pathogens*, eds Brogden KA (ASM Press, Washington D.C), pp 297–313.
8. McDaniel LS, Scott G, Kearney JF, Briles DE (1984) Monoclonal antibodies against protease sensitive pneumococcal antigens can protect mice from fatal infection with *Streptococcus pneumoniae*. *J Exp Med* 160:386–397.

**A Chromosomal regions in *S. Typhimurium* UK-1**

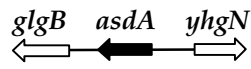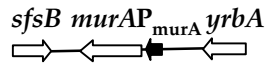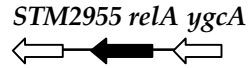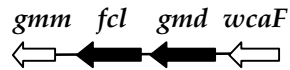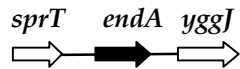

■ Deleted region

**Chromosomal mutations in  $\chi$ 8937**

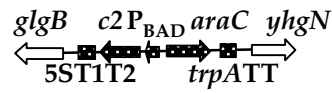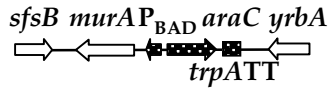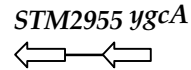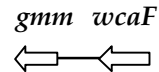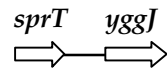

■ Inserted fragment

**B**

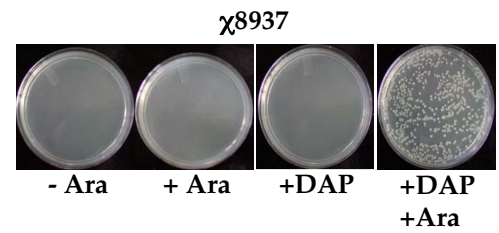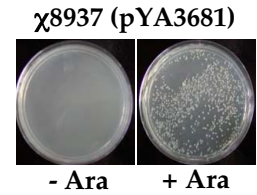

**Fig. S1.** Defined deletion mutations of strain  $\chi$ 8937 and nutritional requirements. (A) The defined deletion chromosomal mutations in wild-type *Salmonella* UK-1 and in strain  $\chi$ 8937. (P) promoter, TT: transcriptional terminator. (B) The growth of host strain  $\chi$ 8937 alone or strain  $\chi$ 8937 harboring pYA3681 on LB agar plates with or without supplementations.

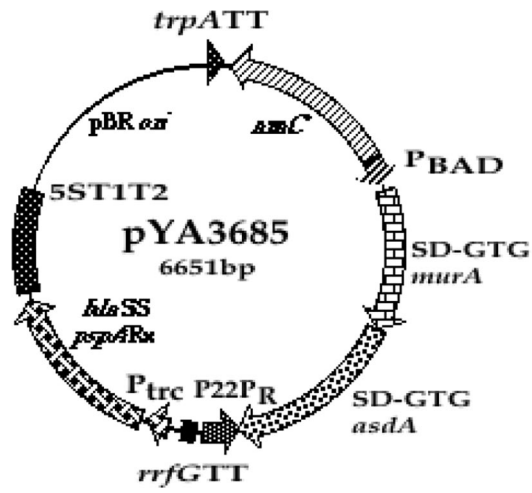

**Fig. S2.** Map of plasmid pYA3685. Plasmid sequences include the *trpA*, *rrfG*, and 5S ribosomal RNA transcriptional terminators; the  $P_{BAD}$ ,  $P_{trc}$ , and  $P_{22PR}$  promoters; the *araC* gene and start codon-modified *murA* and *asdA* genes; and the *bla-pppA* fusion protein.

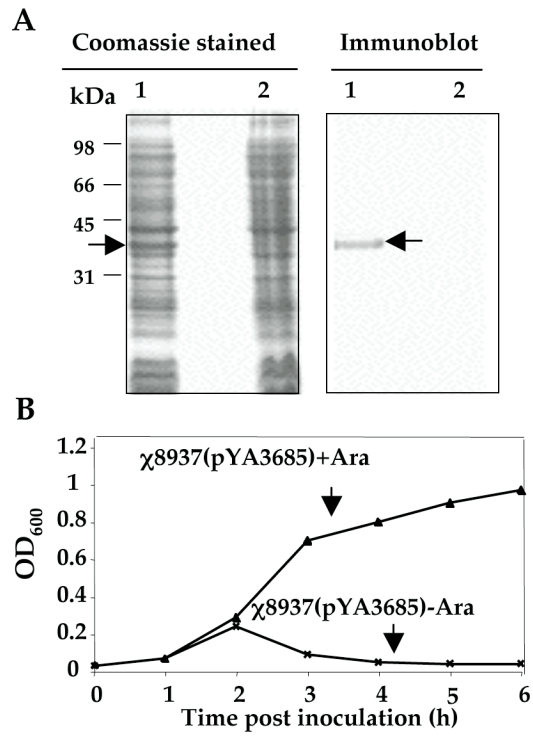

**Fig. S3.** Expression of PspA Rx1 and arabinose-dependent growth of  $\chi_{8937}(\text{pYA3685})$ . (A) The expression of rPspA Rx1 in the programmed lysis *S. Typhimurium* strain  $\chi_{8937}(\text{pYA3685})$  grown in LB broth with 0.02% arabinose at 37°C. Aliquots of mid-log phase cultures were subjected to SDS/PAGE or immunoblot analysis. The immunoblot was probed with anti-PspA antibody. PspA proteins are indicated by arrows. Lanes 1 and 2, protein from  $\chi_{8937}(\text{pYA3685})$  and  $\chi_{8937}(\text{pYA3681})$ , respectively. (B) Growth curves of PspA-expressing strain  $\chi_{8937}(\text{pYA3685})$  in LB broth with or without the addition of 0.02% arabinose.

**Table S1. Bacterial strains and plasmids used in this study**

| Strain or plasmid          | Description                                                                                                                                                   | Source             |
|----------------------------|---------------------------------------------------------------------------------------------------------------------------------------------------------------|--------------------|
| <b>S. Typhimurium UK-1</b> |                                                                                                                                                               |                    |
| χ3761                      | Wild type                                                                                                                                                     | 1                  |
| χ8276                      | Δ <i>asdA16</i>                                                                                                                                               | 2                  |
| χ8290                      | Δ <i>asdA19::TT araC P<sub>BAD</sub> c2</i>                                                                                                                   | This study         |
| χ8645                      | Δ <i>P<sub>murA7::araC P<sub>BAD</sub> murA</sub></i>                                                                                                         | This study         |
| χ8831                      | Δ( <i>gmd-fcl</i> )-26                                                                                                                                        | This study         |
| χ8844                      | Δ <i>endA2311</i>                                                                                                                                             | This study         |
| χ8882                      | Δ <i>relA1123</i>                                                                                                                                             | This study         |
| χ8937                      | Δ <i>asdA19::araC P<sub>BAD</sub> c2</i> Δ <i>P<sub>murA7::araC P<sub>BAD</sub> murA</sub></i> Δ( <i>gmd-fcl</i> )-26<br>Δ <i>relA1123</i> Δ <i>endA2311</i>  | This study         |
| χ9379                      | χ3761 Δ <i>atrB13::MudJ</i>                                                                                                                                   | This study         |
| χ9380                      | χ8937 Δ <i>atrB13::MudJ</i>                                                                                                                                   | This study         |
| <b>E. coli K-12</b>        |                                                                                                                                                               |                    |
| χ289                       | <i>glnV42</i> λ <sup>-</sup> T3 <sup>r</sup>                                                                                                                  | 3                  |
| MGN-617                    | <i>thi-1 thr-1 leuB6 fhuA21 lacY1 glnV44 asdA4 recA1 RP4 2-Tc::Mu [pir]</i>                                                                                   | 4                  |
| <b>Suicide vectors</b>     |                                                                                                                                                               |                    |
| pMEG-443                   | Δ <i>asdA16</i>                                                                                                                                               | Megan Health, Inc. |
| pMEG-611                   | Δ <i>asdA19::TT araC P<sub>BAD</sub> c2</i>                                                                                                                   | Megan Health, Inc. |
| pMEG-902                   | Δ <i>P<sub>murA7::araC P<sub>BAD</sub> murA</sub></i>                                                                                                         | Megan Health, Inc. |
| pYA3629                    | Δ( <i>gmd-fcl</i> )-26                                                                                                                                        | This study         |
| pYA3652                    | Δ <i>endA2311</i>                                                                                                                                             | This study         |
| pYA3679                    | Δ <i>relA1123</i>                                                                                                                                             | This study         |
| <b>Plasmids</b>            |                                                                                                                                                               |                    |
| pYA3450                    | p15A <i>ori araC P<sub>BAD</sub> SD-ATG asdA</i>                                                                                                              | This study         |
| pYA3530                    | p15A <i>ori araC P<sub>BAD</sub> SD-GTG asdA</i>                                                                                                              | This study         |
| pYA3681                    | pBR <i>ori araC* P<sub>BAD</sub> SD-GTG asdA SD-GTG murA P22 P<sub>R</sub> anti-sense mRNA</i>                                                                | This study         |
| pYA3685                    | pBR <i>ori araC* P<sub>BAD</sub> SD-GTG asdA SD-GTG murA P22 P<sub>R</sub> anti-sense mRNA,</i><br><i>rPspA Rx1</i><br><i>araC* P<sub>BAD</sub> from χ289</i> | This study         |

1. Curtiss R, III *et al.* (1991) in *Colonization Control of Human Bacterial Enteropathogens in Poultry*, eds Bailey JHS, Cox NA, Stern NJ, Meinersmann RJ (Academic, New York), pp 169–198.
2. Kang HY, Srinivasan J, Curtiss R, III (2002) Immune responses to recombinant pneumococcal PspA antigen delivered by live attenuated *Salmonella enterica* serovar Typhimurium vaccine. *Infect Immun* 70:1739–1749.
3. Curtiss R, III, Charamella LJ, Berg CM, Harris PE (1965) Kinetic and genetic analyses of D-cycloserine inhibition and resistance in *Escherichia coli*. *J Bacteriol* 90:1238–1250.
4. Roland K, Curtiss R, III, Sizemore D (1999) Construction and evaluation of a *cya crp* *Salmonella typhimurium* strain expressing avian pathogenic *Escherichia coli* 078 LPS as a vaccine to prevent airsacculitis in chickens. *Avian Dis* 43:429–441.

**Table S2. Primers used in this study**

| Primer name                                     | Sequence                                                                               |
|-------------------------------------------------|----------------------------------------------------------------------------------------|
| Construction of plasmid pYA3681                 |                                                                                        |
| GTG <i>asd</i>                                  |                                                                                        |
| GTG <i>asd</i> 5'                               | cag gaa aaa aac gct gtg aaa aat gtt gg                                                 |
| GTG <i>asd</i> 3'                               | gtc ctt ttt ttg cga cac ttt tta caa cc                                                 |
| <i>araC</i> P <sub>BAD</sub> GTG <i>asd</i>     |                                                                                        |
| <i>araC-SmaI</i>                                | cga ccc ggg atc gat ctg tgc ggt att tca cac cg                                         |
| <i>asd-SmaI</i>                                 | gca ccc ggg tcg aca gat cct tgg cgg cga gaa ag                                         |
| <i>araC*</i> P <sub>BAD</sub> (from $\chi$ 289) |                                                                                        |
| <i>EaraC-NsiI</i>                               | cca atg cat aat gtg cct gtc aaa tgg                                                    |
| <i>EaraBAD-EcoRI</i>                            | cgg aat tcg cta gcc caa aaa aac g                                                      |
| <i>murA</i>                                     |                                                                                        |
| <i>EmurA-EcoRI</i> 5'                           | cgg aat tct gag aac aaa cta aat gg                                                     |
| <i>EmurA-EcoRI</i> 3'                           | cgg aat tct tat tcg cct ttc aca cgc                                                    |
| GTG <i>murA</i>                                 |                                                                                        |
| EMGTGRV- <i>NcoI</i>                            | cat gcc atg gag ctc ggt acc cgg gga t                                                  |
| EMGTG- <i>NcoI-EcoRI</i>                        | cat gcc atg gaa ttc tga gaa caa act aag tgg ata aat ttc gtg ttc ag                     |
| P <sub>trc</sub> -pBR <i>ori</i> cassette       |                                                                                        |
| P <sub>trc</sub> - <i>PmeI</i>                  | agc ttt gtt taa acg gat ctt ccg gaa gac ctt cca ttc                                    |
| <i>XbaI</i> -pBR                                | gct cta gac tgt cag acc aag ttt act cat a                                              |
| Synthetic <i>rrfG</i> TT                        |                                                                                        |
| <i>rrfG</i> TT                                  | aac tgc agt cta gat tat gcg aaa ggc cat cct gac gga tgg cct ttt tgt tta aac gga tcc gc |
| Construction of plasmid pYA3685                 |                                                                                        |
| <i>NcoI</i> - <i>bla</i> -PspA                  | cat gcc atg ggt att caa cat ttc cgt gtc gcc ctt att c                                  |
| <i>SmaI</i> -TAA-PspA                           | tcc ccc ggg cta tta ttc tac att att gtt ttc t                                          |
| Construction of suicide vectors                 |                                                                                        |
| $\Delta$ <i>relA1123</i>                        |                                                                                        |
| <i>relA</i> C- <i>SphI</i>                      | aca tgc atg ccc aga tat ttt cca gat ctt cac                                            |
| <i>relA</i> C- <i>EcoRI</i>                     | cgg aat tca ccc cag aca gta atc atg tag cgg                                            |
| <i>relA</i> N- <i>EcoRI</i>                     | cgg aat tca agg gac cag gcc tac cga ag                                                 |
| <i>relA</i> N- <i>BamHI</i>                     | cgg gat ccg agg gcg ttc cgg cgc tgg tag aa                                             |
| $\Delta$ ( <i>gmd-fcI</i> )-26                  |                                                                                        |
| <i>wcaF-XbaI</i>                                | gct cta gat cct caa ata gtc ccg tta gg                                                 |
| <i>wcaF-SmaI</i>                                | tcc ccc ggg caa aat att gta tcg ctg g                                                  |
| <i>gmm-SphI</i>                                 | gcacgc atg ctc agg cag gcg taa atc gct ct                                              |
| <i>gmm-XbaI</i>                                 | cct cta gac aat gtt ttt acg tca gga aga tt                                             |
| $\Delta$ <i>endA2311</i>                        |                                                                                        |
| <i>endAN-BamHI</i>                              | cgg gat ccg cta cga aat ccg cct caa c                                                  |
| <i>endAN-HindIII</i>                            | ccc aag ctt agc aaa acg agc ccg caa cg                                                 |
| <i>endAC-HindIII</i>                            | ccc aag ctt cct aca cta gcg gga ttc ttg                                                |
| <i>endAC-SphI</i>                               | aca tgc atg ccg cag cgc tca gag                                                        |
